# Supplementary material for: On-line gradient monitoring during plug-flow hydrolysis: a tool to support flexible operation?
Source: Research Square preprint supplement (doi:10.21203/rs.3.rs-3286576/v1), 2023-09-02
Supplement: Supplementary file 1 [file e7485c6a03288335aa79cdca.docx]

**Supplementary Material**

**Table S1** Pearson correlation factors between all measured parameters for PFR2 during W1 - W53 (week 5 excluded) at the inlet (top, white) and center (grey), and outlet port (bottom, white) of the reactor

|  | *pH* | *Cond.* | *ORP* | *sCOD* | *SCCA* | *Acidifi-cation* | *PCA 1 (FDAP)* | *PCA 2 (FDAP)* | *SHY* | *SHR* | *AY* | *APR* | *Butyric acid* | *Lactic acid* | *CO2* | *H2* | *CH4* | *Gas yield* |
| --- | --- | --- | --- | --- | --- | --- | --- | --- | --- | --- | --- | --- | --- | --- | --- | --- | --- | --- |
| *pH* |  | -0.37 | **-0.72** | -0.41 | -0.14 | 0.47 | 0.22 | -0.58 | -0.04 | 0.12 | 0.02 | 0.18 | 0.34 | **-0.78** | 0.32 | 0.21 | -0.19 | 0.31 |
| *Cond.* | -0.10 |  | 0.39 | 0.58 | 0.12 | -0.47 | 0.02 | 0.02 | 0.08 | 0.03 | 0.00 | -0.10 | -0.26 | 0.49 | 0.20 | 0.15 | **0.81** | 0.25 |
| *ORP* | -0.55 | 0.08 |  | 0.02 | -0.41 | **-0.73** | -0.14 | 0.47 | -0.43 | -0.47 | -0.52 | -0.53 | **-0.79** | **0.75** | -0.57 | -0.63 | 0.34 | -0.43 |
| *sCOD* | 0.39 | -0.51 | -0.48 |  | **0.74** | -0.16 | 0.06 | 0.02 | 0.58 | 0.32 | 0.55 | 0.22 | 0.20 | 0.48 | 0.43 | 0.38 | 0.14 | 0.28 |
| *SCCA* | 0.56 | -0.42 | -0.43 | **0.73** |  | 0.50 | 0.03 | -0.15 | **0.70** | 0.58 | **0.85** | 0.62 | 0.71 | 0.04 | 0.67 | 0.67 | -0.26 | 0.38 |
| *Acidification* | 0.57 | 0.12 | -0.21 | -0.11 | 0.50 |  | 0.01 | -0.29 | 0.33 | 0.43 | 0.61 | 0.59 | **0.88** | **-0.71** | 0.54 | 0.64 | -0.43 | 0.25 |
| *PCA1 (FDAP)* | 0.07 | -0.03 | -0.16 | -0.09 | -0.16 | -0.06 |  | 0.25 | 0.17 | 0.06 | 0.17 | 0.09 | -0.01 | -0.06 | -0.25 | 0.02 | -0.28 | -0.04 |
| *PCA 2 (FDAP)* | -0.37 | -0.31 | 0.56 | -0.02 | -0.05 | -0.17 | 0.08 |  | -0.13 | -0.16 | -0.03 | -0.11 | -0.30 | 0.35 | -0.62 | -0.27 | -0.31 | -0.43 |
| *SHY* | 0.47 | -0.17 | -0.21 | 0.36 | 0.52 | 0.46 | -0.06 | -0.11 |  | **0.94** | **0.81** | **0.77** | 0.56 | 0.00 | 0.41 | 0.55 | -0.07 | 0.36 |
| *SHR* | 0.62 | -0.40 | -0.28 | 0.54 | **0.86** | 0.64 | -0.12 | 0.08 | **0.93** |  | **0.86** | **0.92** | 0.61 | -0.21 | 0.46 | 0.60 | 0.02 | 0.43 |
| *AY* | 0.43 | -0.16 | -0.18 | 0.24 | 0.60 | 0.62 | -0.03 | -0.05 | **0.78** | **0.81** |  | **0.95** | **0.79** | -0.17 | 0.56 | 0.68 | -0.33 | 0.37 |
| *APR* | **0.77** | -0.12 | -0.28 | 0.23 | 0.68 | **0.90** | -0.06 | -0.16 | **0.73** | **0.89** | **0.94** |  | **0.69** | -0.30 | 0.53 | 0.65 | -0.13 | 0.42 |
| *Butyric acid* | **0.77** | -0.12 | -0.28 | 0.23 | 0.68 | **0.90** | -0.06 | -0.16 | 0.62 | 0.62 | **0.78** | **0.69** |  | -0.63 | 0.66 | **0.78** | -0.38 | 0.34 |
| *Lactic acid* | -0.47 | -0.43 | 0.08 | 0.46 | 0.10 | **-0.70** | -0.21 | 0.22 | -0.04 | -0.22 | -0.13 | -0.28 | -0.62 |  | -0.26 | -0.38 | 0.32 | -0.14 |
| *CO2* | **0.75** | 0.03 | **-0.72** | 0.49 | 0.64 | 0.54 | -0.12 | -0.51 | 0.48 | 0.51 | 0.55 | 0.52 | 0.65 | -0.25 |  | **0.69** | 0.06 | 0.63 |
| *H2* | **0.81** | -0.27 | -0.38 | 0.41 | 0.68 | 0.64 | -0.03 | -0.14 | 0.60 | 0.63 | **0.71** | 0.68 | **0.78** | -0.37 | **0.69** |  | 0.08 | 0.58 |
| *CH4* | -0.09 | 0.60 | 0.09 | 0.03 | -0.22 | -0.43 | -0.10 | -0.21 | -0.14 | -0.01 | -0.32 | -0.13 | -0.40 | 0.34 | 0.06 | 0.08 |  | 0.34 |
| *Gas yield* | 0.56 | 0.06 | -0.41 | 0.31 | 0.38 | 0.25 | 0.04 | -0.33 | 0.37 | 0.45 | 0.39 | 0.45 | 0.35 | -0.13 | 0.63 | 0.58 | 0.34 |  |
|  |  |  |  |  |  |  |  |  |  |  |  |  |  |  |  |  |  |  |
| *pH* |  | 0.09 | **-0.70** | -0.02 | 0.09 | 0.40 | 0.12 | -0.56 | 0.21 | 0.22 | 0.19 | 0.19 | 0.43 | -0.61 | 0.56 | 0.41 | -0.03 | 0.52 |
| *Cond.* |  |  | 0.48 | -0.31 | -0.56 | -0.27 | -0.07 | -0.18 | -0.41 | -0.17 | -0.60 | -0.27 | -0.46 | -0.13 | -0.04 | -0.38 | **0.71** | 0.08 |
| *ORP* |  |  |  | -0.06 | -0.50 | **-0.72** | -0.08 | 0.39 | -0.42 | -0.40 | -0.59 | -0.47 | **-0.82** | 0.58 | -0.59 | -0.63 | 0.44 | -0.44 |
| *sCOD* |  |  |  |  | 0.67 | -0.20 | 0.05 | -0.21 | **0.74** | 0.38 | 0.47 | 0.22 | 0.15 | 0.48 | 0.48 | 0.32 | 0.13 | 0.31 |
| *SCCA* |  |  |  |  |  | 0.47 | 0.04 | -0.22 | **0.75** | 0.57 | **0.87** | 0.64 | **0.72** | 0.06 | **0.69** | 0.68 | -0.25 | 0.38 |
| *Acidification* |  |  |  |  |  |  | 0.01 | -0.18 | 0.25 | 0.38 | 0.60 | 0.59 | **0.87** | **-0.70** | 0.54 | 0.64 | -0.43 | 0.25 |
| *PCA1 (FDAP)* |  |  |  |  |  |  |  | 0.27 | 0.01 | 0.03 | 0.04 | 0.05 | 0.01 | -0.05 | -0.08 | -0.03 | -0.12 | 0.03 |
| *PCA 2 (FDAP)* |  |  |  |  |  |  |  |  | -0.22 | -0.24 | -0.09 | -0.15 | -0.23 | 0.16 | -0.58 | -0.21 | -0.21 | -0.37 |
| *SHY* |  |  |  |  |  |  |  |  |  | **0.94** | **0.86** | **0.84** | 0.56 | 0.04 | 0.59 | 0.58 | -0.03 | 0.46 |
| *SHR* |  |  |  |  |  |  |  |  |  |  | **0.85** | **0.94** | 0.59 | -0.19 | 0.56 | 0.59 | 0.05 | 0.50 |
| *AY* |  |  |  |  |  |  |  |  |  |  |  | **0.95** | **0.80** | -0.17 | 0.59 | 0.69 | -0.32 | 0.38 |
| *APR* |  |  |  |  |  |  |  |  |  |  |  |  | **0.71** | -0.30 | 0.56 | 0.66 | -0.13 | 0.44 |
| *Butyric acid* |  |  |  |  |  |  |  |  |  |  |  |  |  | -0.61 | 0.67 | **0.79** | -0.38 | 0.35 |
| *Lactic acid* |  |  |  |  |  |  |  |  |  |  |  |  |  |  | -0.26 | -0.39 | 0.30 | -0.14 |
| *CO2* |  |  |  |  |  |  |  |  |  |  |  |  |  |  |  | **0.69** | 0.06 | 0.63 |
| *H2* |  |  |  |  |  |  |  |  |  |  |  |  |  |  |  |  | 0.08 | 0.58 |
| *CH4* |  |  |  |  |  |  |  |  |  |  |  |  |  |  |  |  |  | 0.34 |

Abbreviations: Cond. - conductivity, ORP - oxidation-reduction potential, sCOD - soluble COD, SCCA - short chain carboxylic acids,
 SHY - specific hydrolysis yield, SHR - specific hydrolysis rate, AY - acid yield, APR - acid production rate

**Table S2** Pearson correlation factors between *on-line* monitoring and measured process parameters for both PFRs in the inlet (top, white), center (grey), and outlet port (bottom, white) during continuous dynamic fermentation over 123 weeks, with variations of feedstock composition, HRT, thin-sludge-recirculation and under bioaugmentation.

|  | *pH* | *Cond.* | *ORP* | *sCOD* | *SCCA* | *Acidifi-cation* | *PCA 1 (FDAP)* | *PCA 2 (FDAP)* | *SHY* | *SHR* | *AY* | *APR* | *Butyric acid* | *Lactic acid* | *CO2* | *H2* | *CH4* | *Gas yield* |
| --- | --- | --- | --- | --- | --- | --- | --- | --- | --- | --- | --- | --- | --- | --- | --- | --- | --- | --- |
| *pH* |  | 0.38 | -0.26 | -0.51 | -0.39 | 0.14 | 0.47 | -0.58 | -0.12 | -0.32 | -0.30 | -0.19 | -0.07 | -0.57 | 0.12 | 0.19 | **0.68** | 0.33 |
| *Cond.* | 0.25 |  | 0.04 | -0.12 | -0.18 | -0.17 | 0.48 | -0.28 | 0.03 | -0.32 | -0.17 | -0.15 | -0.24 | 0.05 | -0.02 | 0.13 | 0.59 | 0.31 |
| *ORP* | -0.40 | 0.08 |  | 0.11 | -0.16 | -0.70 | 0.21 | 0.08 | -0.63 | 0.08 | -0.47 | -0.45 | -0.66 | **0.75** | -0.41 | -0.46 | -0.35 | -0.44 |
| *sCOD* | -0.05 | -0.40 | -0.09 |  | **0.88** | -0.07 | -0.17 | 0.26 | 0.07 | 0.55 | 0.44 | 0.10 | 0.43 | 0.52 | 0.59 | 0.02 | **-0.72** | 0.31 |
| *SCCA* | 0.13 | -0.35 | -0.19 | 0.86 |  | 0.37 | -0.14 | 0.26 | 0.26 | 0.53 | **0.67** | 0.29 | **0.72** | 0.22 | **0.69** | 0.25 | -0.63 | 0.37 |
| *Acidification* | 0.56 | -0.05 | -0.40 | -0.04 | 0.40 |  | -0.09 | 0.02 | 0.55 | 0.05 | 0.60 | 0.49 | **0.79** | **-0.66** | 0.31 | 0.61 | 0.13 | 0.25 |
| *PCA1 (FDAP)* | 0.07 | 0.50 | 0.16 | -0.28 | -0.24 | -0.14 |  | -0.01 | -0.32 | -0.29 | -0.34 | -0.38 | -0.23 | 0.06 | -0.05 | 0.05 | 0.56 | 0.08 |
| *PCA 2 (FDAP)* | -0.27 | -0.25 | 0.34 | 0.24 | 0.23 | 0.01 | 0.01 |  | 0.07 | -0.07 | 0.14 | -0.02 | 0.14 | 0.19 | -0.14 | -0.20 | -0.43 | -0.41 |
| *SHY* | 0.53 | -0.23 | -0.42 | 0.06 | 0.21 | 0.55 | -0.39 | 0.06 |  | 0.22 | 0.81 | **0.83** | 0.53 | -0.39 | 0.03 | 0.59 | 0.35 | 0.41 |
| *SHR* | -0.16 | -0.43 | -0.23 | 0.57 | 0.52 | 0.06 | -0.30 | 0.00 | 0.09 |  | 0.56 | 0.52 | 0.33 | 0.31 | 0.48 | 0.20 | -0.60 | 0.34 |
| *AY* | 0.33 | -0.39 | -0.46 | 0.47 | **0.72** | 0.66 | -0.41 | 0.17 | **0.74** | 0.47 |  | **0.88** | **0.73** | -0.13 | 0.55 | 0.47 | -0.42 | 0.40 |
| *APR* | 0.29 | -0.35 | -0.57 | 0.10 | 0.29 | 0.55 | -0.44 | 0.03 | **0.79** | 0.44 | **0.84** |  | 0.48 | -0.21 | 0.40 | 0.60 | -0.19 | 0.41 |
| *Butyric acid* | 0.52 | -0.26 | -0.30 | 0.45 | **0.71** | **0.80** | -0.27 | 0.12 | 0.50 | 0.34 | **0.75** | 0.51 |  | -0.43 | 0.62 | 0.58 | -0.24 | 0.37 |
| *Lactic acid* | -0.63 | -0.27 | 0.20 | 0.49 | 0.23 | -0.65 | -0.01 | 0.23 | -0.43 | 0.31 | -0.13 | -0.24 | -0.42 |  | -0.01 | -0.42 | -0.50 | -0.18 |
| *CO2* | 0.44 | -0.08 | -0.60 | 0.63 | **0.69** | 0.33 | -0.20 | -0.12 | 0.07 | 0.53 | 0.57 | 0.42 | 0.63 | 0.00 |  | 0.33 | -0.18 | 0.64 |
| *H2* | 0.57 | -0.07 | -0.40 | 0.00 | 0.24 | 0.62 | 0.04 | -0.11 | 0.62 | 0.21 | 0.48 | 0.61 | 0.58 | -0.45 | 0.30 |  | 0.03 | 0.58 |
| *CH4* | 0.40 | 0.66 | -0.03 | **-0.70** | -0.62 | 0.10 | 0.45 | -0.46 | 0.35 | -0.60 | -0.41 | -0.21 | -0.26 | -0.48 | -0.20 | 0.05 |  | 0.34 |
| *Gas yield* | 0.59 | 0.03 | -0.41 | 0.32 | 0.36 | 0.24 | -0.02 | -0.31 | 0.42 | 0.36 | 0.39 | 0.42 | 0.35 | -0.17 | 0.63 | 0.56 | 0.33 |  |
|  |  |  |  |  |  |  |  |  |  |  |  |  |  |  |  |  |  |  |
| *pH* |  | 0.35 | -0.36 | -0.35 | -0.29 | 0.22 | 0.32 | -0.48 | 0.19 | -0.43 | -0.11 | -0.04 | 0.08 | -0.66 | 0.14 | 0.10 | 0.64 | 0.38 |
| *Cond.* |  |  | 0.33 | 0.10 | -0.09 | -0.42 | 0.31 | -0.23 | -0.51 | -0.05 | -0.42 | -0.50 | -0.33 | 0.17 | 0.09 | -0.42 | 0.13 | 0.17 |
| *ORP* |  |  |  | 0.03 | -0.29 | **-0.68** | 0.03 | 0.32 | -0.35 | -0.29 | -0.51 | -0.53 | -0.65 | 0.55 | -0.57 | -0.61 | -0.13 | -0.40 |
| *sCOD* |  |  |  |  | 0.83 | -0.11 | -0.25 | 0.15 | 0.06 | 0.59 | 0.44 | 0.08 | 0.40 | 0.47 | 0.63 | 0.01 | **-0.65** | 0.34 |
| *SCCA* |  |  |  |  |  | 0.38 | -0.27 | 0.12 | 0.19 | 0.54 | **0.71** | 0.30 | **0.72** | 0.19 | **0.70** | 0.27 | -0.64 | 0.36 |
| *Acidification* |  |  |  |  |  |  | -0.19 | -0.04 | 0.50 | 0.00 | 0.64 | 0.55 | **0.78** | -0.64 | 0.26 | 0.61 | 0.10 | 0.19 |
| *PCA1 (FDAP)* |  |  |  |  |  |  |  | -0.04 | -0.38 | -0.28 | -0.43 | -0.43 | -0.29 | -0.04 | -0.16 | 0.02 | 0.45 | 0.05 |
| *PCA 2 (FDAP)* |  |  |  |  |  |  |  |  | 0.05 | -0.02 | 0.08 | -0.01 | 0.04 | 0.29 | -0.25 | -0.23 | -0.38 | -0.34 |
| *SHY* |  |  |  |  |  |  |  |  |  | 0.06 | **0.72** | **0.77** | 0.46 | -0.41 | 0.09 | 0.58 | 0.38 | 0.49 |
| *SHR* |  |  |  |  |  |  |  |  |  |  | 0.50 | 0.47 | 0.31 | 0.36 | 0.60 | 0.17 | -0.63 | 0.47 |
| *AY* |  |  |  |  |  |  |  |  |  |  |  | **0.84** | **0.75** | -0.13 | 0.59 | 0.46 | -0.41 | 0.40 |
| *APR* |  |  |  |  |  |  |  |  |  |  |  |  | 0.51 | -0.24 | 0.45 | 0.60 | -0.18 | 0.43 |
| *Butyric acid* |  |  |  |  |  |  |  |  |  |  |  |  |  | -0.42 | 0.65 | 0.58 | -0.27 | 0.36 |
| *Lactic acid* |  |  |  |  |  |  |  |  |  |  |  |  |  |  | -0.01 | -0.46 | -0.48 | -0.17 |
| *CO2* |  |  |  |  |  |  |  |  |  |  |  |  |  |  |  | 0.31 | -0.20 | 0.63 |
| *H2* |  |  |  |  |  |  |  |  |  |  |  |  |  |  |  |  | 0.04 | 0.56 |
| *CH4* |  |  |  |  |  |  |  |  |  |  |  |  |  |  |  |  |  | 0.34 |
